# Supplementary material for: Characteristics of Long Non-coding RNAs in the Brown Norway Rat and Alterations in the Dahl Salt-Sensitive Rat
Source: PubMed Central journal article supplement — Sci Rep. 2014 Nov 21;4:7146. doi: 10.1038/srep07146 (PMC4894415; doi:10.1038/srep07146), 2014-11-21
Supplement: srep07146-s1.pdf [file srep07146-s1.pdf]

## Supplementary Information

### Characteristics of Long Non-coding RNAs in the Brown Norway Rat and Alterations in the Dahl Salt-Sensitive Rat

Feng Wang<sup>1,2,3,\*</sup>, Liping Li<sup>5,\*</sup>, Haiming Xu<sup>5</sup>, Yong Liu<sup>2,3</sup>, Chun Yang<sup>2</sup>, Allen W. Cowley,  
Jr.<sup>2</sup>, Niansong Wang<sup>1</sup>, Pengyuan Liu<sup>2,3,4</sup>, Mingyu Liang<sup>2,3</sup>

<sup>1</sup>Department of Nephrology and Rheumatology, Shanghai Jiaotong University Affiliated Sixth People's Hospital, Shanghai, China; <sup>2</sup>Department of Physiology, <sup>3</sup>Center of Systems Molecular Medicine, and <sup>4</sup>Cancer Center, Medical College of Wisconsin, Milwaukee, WI, USA; <sup>5</sup>Institute of Bioinformatics, Zhejiang University, Hangzhou, Zhejiang 310029, China

\*Equal contribution

Running title: Rat lncRNAs

Correspondence:

Mingyu Liang, [mliang@mcw.edu](mailto:mliang@mcw.edu)

Pengyuan Liu, [pliu@mcw.edu](mailto:pliu@mcw.edu)

Niansong Wang, [wangniansong2012@163.com](mailto:wangniansong2012@163.com)

## Supplementary Table S1. PCR Primers.

Primers for qPCR verification of lncRNA expression:

Liver-enriched lncRNA transcript\_id:TCONS\_00048236:

F: 5'CGTGCACTGgGGGATGG3'

R: 5'AATTACCTACCTCGGTTTGAGTTCTC3'

Cardiac left ventricle-enriched lncRNA transcript\_id:TCONS\_00060042:

F: 5'AGAAAGaGTCAGCGTCACCACA3'

R: 5'TGCAGCCTACAATCCATCCA3'

Renal outer medulla-enriched lncRNA transcript\_id:TCONS\_00047331:

F: 5'ATGGGGCAAaACTGGAAaAATA3'

R: 5'TGAAGACGATGCAGGGATGAC3'

Renal cortex-enriched lncRNA transcript\_id:TCONS\_00112095:

F: 5'AAAgGGACAGGAGGACCACAC3'

R: 5'TGCACCACAAGCCCACATT3'

Hypothalamus-enriched lncRNA transcript\_id:TCONS\_00090635:

F: 5'ATCGAGGGACAAGCAACAAAGA3'

R: 5'CAGGGAAGGACTCAGACTCAAGATA3'

Adrenal gland-enriched lncRNA transcript\_id:TCONS\_00081178:

F: 5'GCACTGCCAGCGGACATC3'

R: 5'GTCATTGTGGGATCtTGGCTGTA3'

lncRNA identified in SS and SS.13<sup>BN26</sup>, transcript\_id:TCONS\_00028980:

Primers for transcript\_id:TCONS\_00028980:

F: 5'GTTTTGGCTTGGCTACACATTCTA3'

R: 5'CCTCCGGCTTTCCATACAGTT3'

lncRNA identified in SS and SS.13<sup>BN26</sup>, transcript\_id:TCONS\_00029009:

F: 5'GGAGCGGGTATAGGGAGGAG3'

R: 5'TGGGTCTTTCGGAGCATAACAAT3'

Primers for genomic DNA segments pulled out by chromatin immunoprecipitation

(ChIP)

Rat GAPDH promotor region:

F: 5'AGCTCCCCTCCCCCTCTC3'

R: 5'GACCCGCCTCGTTTTTGAAT3'

Rat myoglobin exon 2 region:

F: 5'CTTGGTGGCGTGGGACTG3'

R: 5'AGGGACAACATGCTGCTGAGA3'

Promoter region of liver-enriched lncRNA transcript\_id:TCONS\_00048236:

F: 5'ATACATGCCTCAGAGAAATCAATCA3'

R: 5'AGGGCGCCAGAGAAAACAC3'

Promoter region of cardiac left ventricle-enriched lncRNA transcript\_id:

TCONS\_00060042:

F: 5'TGTGAAATGTAATGCAAATAAAAATCTG3'

R: 5'TGTATATGACCTAAGCAAGTGAGTAAGC3'

Promoter region of renal outer medulla-enriched lncRNA transcript\_id:

TCONS\_00047331:

F: 5'ATTGTTTCATGCTCTTCTCTATTTTTG3'

R: 5'GGTTGCCATCCCACAGTCA3'

Promoter region of renal cortex-enriched lncRNA transcript\_id:TCONS\_00112095:

F: 5'GTGTCACTCTCCATCCCGTCTT3'

R: 5'CTCGCACCAGCCCTTGTTT3'

Promoter region of hypothalamus-enriched lncRNA transcript\_id:TCONS\_00090635

F: 5'GAAAAATCATCAGCGACCACAG3'

R: 5'CAGCAAAGAACGAAGGGAGAA3'

Promoter region of adrenal gland-enriched lncRNA transcript\_id:TCONS\_00081178:

F: 5'CTTCTTCCCCATCCTTTATTCAG3'

R: 5'CCTTCCCAGCAGAGCACTTG3'

**Supplementary Table S2. Yield and quality of RNA-seq.** B, hypothalamus; C, renal cortex; G, adrenal gland; Li, liver; LV, cardiac left ventricle; M, renal outer medulla.

Each sample was a pool of two Brown Norway rats.

| Sample ID | Yield (Mbases) | # Reads     | % of $\geq$ Q30 Bases (PF) | Mean Quality Score (PF) | % of mapping rate |
|-----------|----------------|-------------|----------------------------|-------------------------|-------------------|
| 1B        | 4,500          | 47,239,840  | 95.0                       | 35.7                    | 93.7              |
| 2B        | 4,839          | 54,386,532  | 95.6                       | 35.8                    | 88.8              |
| 1C        | 5,060          | 53,183,108  | 94.8                       | 35.6                    | 94.0              |
| 2C        | 5,266          | 58,404,702  | 95.2                       | 35.5                    | 81.8              |
| 1G        | 4,799          | 50,706,222  | 95.0                       | 35.7                    | 93.7              |
| 2G        | 4,851          | 55,411,088  | 95.7                       | 35.8                    | 90.2              |
| 1Li       | 7,577          | 79,940,230  | 94.2                       | 35.4                    | 89.4              |
| 2Li       | 10,066         | 113,499,750 | 93.9                       | 34.8                    | 59.9              |
| 1LV       | 5,257          | 54,702,446  | 94.7                       | 35.5                    | 92.5              |
| 2LV       | 4,709          | 54,427,010  | 95.7                       | 35.9                    | 90.9              |
| 1M        | 4,885          | 51,591,834  | 94.8                       | 35.6                    | 91.5              |
| 2M        | 5,125          | 57,171,486  | 95.5                       | 35.6                    | 86.5              |

**Supplementary Table S3. Renal outer medullary lncRNAs differentially expressed  
between SS and SS.13<sup>BN26</sup> rats. LS, 0.4% salt; HS, 4% salt for 7 days; L26, SS.13<sup>BN26</sup>.**

| <b>SSLS vs. SSHS</b>   |             |                           |          |          |         |         |                   |           |          |          |
|------------------------|-------------|---------------------------|----------|----------|---------|---------|-------------------|-----------|----------|----------|
| test_id                | gene_id     | locus                     | sample_1 | sample_2 | value_1 | value_2 | log2(fold_change) | test_stat | p_value  | q_value  |
| TCONS_00021556         | XLOC_012657 | chr11:12488963-12523584   | SSLS     | SSHS     | 1.74    | 0.69    | -1.34             | -2.44     | 5.00E-05 | 1.65E-02 |
| TCONS_00068324         | XLOC_042461 | chr3:143754260-143770924  | SSLS     | SSHS     | 1.02    | 0.50    | -1.04             | -2.31     | 5.00E-05 | 1.65E-02 |
| TCONS_00091268         | XLOC_056809 | chr6:23353151-23420140    | SSLS     | SSHS     | 0.52    | 0.10    | -2.42             | -2.92     | 5.00E-05 | 1.65E-02 |
| TCONS_00046332         | XLOC_028534 | chr17:22805722-22824878   | SSLS     | SSHS     | 0.53    | 0.24    | -1.11             | -2.19     | 1.50E-04 | 3.77E-02 |
| TCONS_00025003         | XLOC_015014 | chr11:86634046-86641646   | SSLS     | SSHS     | 4.80    | 2.52    | -0.93             | -2.17     | 2.00E-04 | 4.68E-02 |
| <b>L26LS vs. L26HS</b> |             |                           |          |          |         |         |                   |           |          |          |
| test_id                | gene_id     | locus                     | sample_1 | sample_2 | value_1 | value_2 | log2(fold_change) | test_stat | p_value  | q_value  |
| TCONS_00000103         | XLOC_000057 | chr1:9790667-9803141      | L26LS    | L26HS    | 0.74    | 0.36    | -1.03             | -2.83     | 5.00E-05 | 2.56E-03 |
| TCONS_00000191         | XLOC_000126 | chr1:15164486-15175029    | L26LS    | L26HS    | 0.72    | 0.30    | -1.26             | -3.28     | 5.00E-05 | 2.56E-03 |
| TCONS_00006728         | XLOC_004029 | chr1:283886706-283918702  | L26LS    | L26HS    | 0.98    | 0.49    | -1.00             | -3.23     | 5.00E-05 | 2.56E-03 |
| TCONS_00007550         | XLOC_004610 | chr1:35676445-35681226    | L26LS    | L26HS    | 35.63   | 75.17   | 1.08              | 2.48      | 5.00E-05 | 2.56E-03 |
| TCONS_00010104         | XLOC_006191 | chr1:133025461-133029682  | L26LS    | L26HS    | 7.38    | 14.43   | 0.97              | 3.24      | 5.00E-05 | 2.56E-03 |
| TCONS_00025003         | XLOC_015014 | chr11:86634046-86641646   | L26LS    | L26HS    | 5.31    | 9.55    | 0.85              | 2.73      | 5.00E-05 | 2.56E-03 |
| TCONS_00027222         | XLOC_016267 | chr12:17287619-17340258   | L26LS    | L26HS    | 0.93    | 0.37    | -1.33             | -4.44     | 5.00E-05 | 2.56E-03 |
| TCONS_00030100         | XLOC_017946 | chr13:118271149-118366003 | L26LS    | L26HS    | 0.88    | 0.38    | -1.19             | -3.36     | 5.00E-05 | 2.56E-03 |
| TCONS_00036786         | XLOC_021971 | chr15:62741738-62780849   | L26LS    | L26HS    | 0.36    | 0.66    | 0.87              | 2.40      | 5.00E-05 | 2.56E-03 |
| TCONS_00040456         | XLOC_024455 | chr16:32492681-32501908   | L26LS    | L26HS    | 3.86    | 7.27    | 0.91              | 2.36      | 5.00E-05 | 2.56E-03 |
| TCONS_00046332         | XLOC_028534 | chr17:22805722-22824878   | L26LS    | L26HS    | 0.53    | 1.05    | 0.99              | 2.78      | 5.00E-05 | 2.56E-03 |
| TCONS_00048875         | XLOC_030172 | chr18:59610154-59649291   | L26LS    | L26HS    | 1.13    | 0.53    | -1.11             | -3.70     | 5.00E-05 | 2.56E-03 |
| TCONS_00051794         | XLOC_031963 | chr19:58051647-58089624   | L26LS    | L26HS    | 0.47    | 0.20    | -1.23             | -2.94     | 5.00E-05 | 2.56E-03 |
| TCONS_00051991         | XLOC_032117 | chr19:64434724-64444099   | L26LS    | L26HS    | 0.50    | 0.21    | -1.28             | -3.01     | 5.00E-05 | 2.56E-03 |
| TCONS_00053291         | XLOC_032840 | chr19:62801505-62817661   | L26LS    | L26HS    | 7.49    | 16.10   | 1.10              | 2.97      | 5.00E-05 | 2.56E-03 |
| TCONS_00062816         | XLOC_038870 | chr20:16228068-16234127   | L26LS    | L26HS    | 15.70   | 27.96   | 0.83              | 2.86      | 5.00E-05 | 2.56E-03 |
| TCONS_00065760         | XLOC_040637 | chr3:50700650-50708907    | L26LS    | L26HS    | 0.34    | 1.06    | 1.63              | 3.72      | 5.00E-05 | 2.56E-03 |
| TCONS_00073793         | XLOC_045721 | chr4:14726596-14764487    | L26LS    | L26HS    | 2.14    | 5.45    | 1.35              | 2.71      | 5.00E-05 | 2.56E-03 |
| TCONS_00094136         | XLOC_058460 | chr7:35332826-35340356    | L26LS    | L26HS    | 0.73    | 0.36    | -1.02             | -2.56     | 5.00E-05 | 2.56E-03 |
| TCONS_00100576         | XLOC_062456 | chr8:35959275-35993166    | L26LS    | L26HS    | 0.36    | 0.12    | -1.66             | -4.54     | 5.00E-05 | 2.56E-03 |
| TCONS_00100784         | XLOC_062624 | chr8:44243236-44266295    | L26LS    | L26HS    | 0.41    | 0.17    | -1.27             | -3.43     | 5.00E-05 | 2.56E-03 |

|                       |             |                          |          |          |         |         |                   |           |          |          |
|-----------------------|-------------|--------------------------|----------|----------|---------|---------|-------------------|-----------|----------|----------|
| TCONS_00108134        | XLOC_066813 | chr9:113047917-113060881 | L26LS    | L26HS    | 1.17    | 0.57    | -1.03             | -2.58     | 5.00E-05 | 2.56E-03 |
| TCONS_00108810        | XLOC_067239 | chr9:19284677-19311302   | L26LS    | L26HS    | 0.93    | 2.31    | 1.32              | 2.97      | 5.00E-05 | 2.56E-03 |
| TCONS_00076160        | XLOC_047335 | chr4:189552473-189683851 | L26LS    | L26HS    | 0.40    | 0.16    | -1.27             | -2.52     | 1.00E-04 | 4.57E-03 |
| TCONS_00092653        | XLOC_057653 | chr6:118411767-118423149 | L26LS    | L26HS    | 0.90    | 0.52    | -0.79             | -2.25     | 1.00E-04 | 4.57E-03 |
| TCONS_00105479        | XLOC_065326 | chr8:112214827-112217010 | L26LS    | L26HS    | 1.16    | 2.59    | 1.16              | 2.79      | 1.00E-04 | 4.57E-03 |
| TCONS_00105501        | XLOC_065342 | chr8:113414430-113426589 | L26LS    | L26HS    | 0.85    | 0.49    | -0.80             | -2.25     | 1.00E-04 | 4.57E-03 |
| TCONS_00068324        | XLOC_042461 | chr3:143754260-143770924 | L26LS    | L26HS    | 0.98    | 1.61    | 0.71              | 2.21      | 1.50E-04 | 6.49E-03 |
| TCONS_00043125        | XLOC_026481 | chr16:32458036-32475718  | L26LS    | L26HS    | 1.55    | 3.10    | 1.00              | 2.34      | 2.50E-04 | 1.00E-02 |
| TCONS_00051115        | XLOC_031594 | chr19:27667530-27699662  | L26LS    | L26HS    | 0.23    | 0.59    | 1.36              | 2.19      | 3.00E-04 | 1.15E-02 |
| TCONS_00012156        | XLOC_007373 | chr1:222799878-222858973 | L26LS    | L26HS    | 10.23   | 4.80    | -1.09             | -2.09     | 8.50E-04 | 2.74E-02 |
| TCONS_00098168        | XLOC_061029 | chr7:76901927-76904658   | L26LS    | L26HS    | 0.34    | 0.10    | -1.69             | -2.45     | 9.50E-04 | 2.98E-02 |
| TCONS_00007367        | XLOC_004492 | chr1:23178397-23184459   | L26LS    | L26HS    | 0.15    | 0.35    | 1.18              | 2.09      | 1.05E-03 | 3.24E-02 |
| TCONS_00026216        | XLOC_015694 | chr12:39644318-39690870  | L26LS    | L26HS    | 0.47    | 0.22    | -1.08             | -1.94     | 1.10E-03 | 3.37E-02 |
| TCONS_00013936        | XLOC_008374 | chr1:287949285-287961598 | L26LS    | L26HS    | 1.84    | 1.19    | -0.63             | -2.04     | 1.20E-03 | 3.61E-02 |
| TCONS_00055871        | XLOC_034647 | chr2:159578464-159587260 | L26LS    | L26HS    | 0.48    | 0.17    | -1.52             | -2.31     | 1.35E-03 | 3.95E-02 |
| TCONS_00012150        | XLOC_007373 | chr1:222799878-222858973 | L26LS    | L26HS    | 8.52    | 3.23    | -1.40             | -2.20     | 1.65E-03 | 4.61E-02 |
| TCONS_00012154        | XLOC_007373 | chr1:222799878-222858973 | L26LS    | L26HS    | 8.52    | 3.23    | -1.40             | -2.23     | 1.75E-03 | 4.83E-02 |
| <b>SSHS vs. L26HS</b> |             |                          |          |          |         |         |                   |           |          |          |
| test_id               | gene_id     | locus                    | sample_1 | sample_2 | value_1 | value_2 | log2(fold_change) | test_stat | p_value  | q_value  |
| TCONS_00006673        | XLOC_004007 | chr1:281581679-281585476 | L26HS    | SSHS     | 4.19    | 1.13    | -1.89             | -4.50     | 5.00E-05 | 2.94E-03 |
| TCONS_00006675        | XLOC_004007 | chr1:281581679-281585476 | L26HS    | SSHS     | 2.06    | 0.53    | -1.97             | -2.96     | 5.00E-05 | 2.94E-03 |
| TCONS_00007367        | XLOC_004492 | chr1:23178397-23184459   | L26HS    | SSHS     | 0.35    | 0.14    | -1.35             | -2.60     | 5.00E-05 | 2.94E-03 |
| TCONS_00007550        | XLOC_004610 | chr1:35676445-35681226   | L26HS    | SSHS     | 75.84   | 15.73   | -2.27             | -5.61     | 5.00E-05 | 2.94E-03 |
| TCONS_00007551        | XLOC_004610 | chr1:35676445-35681226   | L26HS    | SSHS     | 41.46   | 8.75    | -2.24             | -3.37     | 5.00E-05 | 2.94E-03 |
| TCONS_00007552        | XLOC_004610 | chr1:35676445-35681226   | L26HS    | SSHS     | 42.22   | 10.25   | -2.04             | -3.81     | 5.00E-05 | 2.94E-03 |
| TCONS_00007553        | XLOC_004610 | chr1:35676445-35681226   | L26HS    | SSHS     | 31.90   | 6.20    | -2.36             | -3.84     | 5.00E-05 | 2.94E-03 |
| TCONS_00010104        | XLOC_006191 | chr1:133025461-133029682 | L26HS    | SSHS     | 14.56   | 3.15    | -2.21             | -7.25     | 5.00E-05 | 2.94E-03 |
| TCONS_00011606        | XLOC_007112 | chr1:204698363-204727019 | L26HS    | SSHS     | 0.37    | 0.13    | -1.49             | -2.33     | 5.00E-05 | 2.94E-03 |
| TCONS_00013884        | XLOC_008339 | chr1:285882049-285893782 | L26HS    | SSHS     | 0.52    | 0.11    | -2.19             | -2.96     | 5.00E-05 | 2.94E-03 |
| TCONS_00015341        | XLOC_009184 | chr10:47440265-47450549  | L26HS    | SSHS     | 7.88    | 1.85    | -2.09             | -4.37     | 5.00E-05 | 2.94E-03 |
| TCONS_00021556        | XLOC_012657 | chr11:12488963-12523584  | L26HS    | SSHS     | 1.40    | 0.65    | -1.10             | -2.41     | 5.00E-05 | 2.94E-03 |
| TCONS_00025003        | XLOC_015014 | chr11:86634046-86641646  | L26HS    | SSHS     | 9.64    | 2.39    | -2.01             | -6.52     | 5.00E-05 | 2.94E-03 |

|                |             |                           |       |      |       |      |       |       |          |          |
|----------------|-------------|---------------------------|-------|------|-------|------|-------|-------|----------|----------|
| TCONS_00033476 | XLOC_019988 | chr14:104441312-104448518 | L26HS | SSHS | 11.56 | 4.61 | -1.32 | -3.00 | 5.00E-05 | 2.94E-03 |
| TCONS_00035632 | XLOC_021209 | chr15:8606550-8618498     | L26HS | SSHS | 30.24 | 6.21 | -2.28 | -5.23 | 5.00E-05 | 2.94E-03 |
| TCONS_00036786 | XLOC_021971 | chr15:62741738-62780849   | L26HS | SSHS | 0.66  | 0.23 | -1.52 | -4.19 | 5.00E-05 | 2.94E-03 |
| TCONS_00038754 | XLOC_023289 | chr15:60270126-60288154   | L26HS | SSHS | 2.18  | 4.27 | 0.97  | 3.03  | 5.00E-05 | 2.94E-03 |
| TCONS_00040456 | XLOC_024455 | chr16:32492681-32501908   | L26HS | SSHS | 7.33  | 2.26 | -1.70 | -4.63 | 5.00E-05 | 2.94E-03 |
| TCONS_00040465 | XLOC_024458 | chr16:32724543-32762094   | L26HS | SSHS | 1.88  | 0.49 | -1.94 | -3.29 | 5.00E-05 | 2.94E-03 |
| TCONS_00043125 | XLOC_026481 | chr16:32458036-32475718   | L26HS | SSHS | 3.13  | 0.76 | -2.05 | -4.37 | 5.00E-05 | 2.94E-03 |
| TCONS_00046332 | XLOC_028534 | chr17:22805722-22824878   | L26HS | SSHS | 1.06  | 0.23 | -2.20 | -5.88 | 5.00E-05 | 2.94E-03 |
| TCONS_00046463 | XLOC_028622 | chr17:29938091-29941662   | L26HS | SSHS | 0.61  | 0.17 | -1.87 | -3.28 | 5.00E-05 | 2.94E-03 |
| TCONS_00048938 | XLOC_030213 | chr18:61418077-61425000   | L26HS | SSHS | 2.28  | 0.72 | -1.65 | -2.97 | 5.00E-05 | 2.94E-03 |
| TCONS_00051115 | XLOC_031594 | chr19:27667530-27699662   | L26HS | SSHS | 0.60  | 0.14 | -2.04 | -3.46 | 5.00E-05 | 2.94E-03 |
| TCONS_00051116 | XLOC_031594 | chr19:27667530-27699662   | L26HS | SSHS | 0.54  | 0.12 | -2.12 | -2.65 | 5.00E-05 | 2.94E-03 |
| TCONS_00053291 | XLOC_032840 | chr19:62801505-62817661   | L26HS | SSHS | 16.24 | 3.62 | -2.17 | -5.64 | 5.00E-05 | 2.94E-03 |
| TCONS_00054445 | XLOC_033615 | chr2:71196318-71198519    | L26HS | SSHS | 1.66  | 3.12 | 0.92  | 2.42  | 5.00E-05 | 2.94E-03 |
| TCONS_00056106 | XLOC_034807 | chr2:173290349-173298792  | L26HS | SSHS | 0.48  | 0.16 | -1.61 | -3.83 | 5.00E-05 | 2.94E-03 |
| TCONS_00057476 | XLOC_035582 | chr2:252954503-252963658  | L26HS | SSHS | 1.09  | 0.59 | -0.89 | -2.55 | 5.00E-05 | 2.94E-03 |
| TCONS_00062816 | XLOC_038870 | chr20:16228068-16234127   | L26HS | SSHS | 28.21 | 8.51 | -1.73 | -6.22 | 5.00E-05 | 2.94E-03 |
| TCONS_00065760 | XLOC_040637 | chr3:50700650-50708907    | L26HS | SSHS | 1.07  | 0.24 | -2.15 | -5.00 | 5.00E-05 | 2.94E-03 |
| TCONS_00068324 | XLOC_042461 | chr3:143754260-143770924  | L26HS | SSHS | 1.62  | 0.47 | -1.78 | -5.47 | 5.00E-05 | 2.94E-03 |
| TCONS_00073792 | XLOC_045721 | chr4:14726596-14764487    | L26HS | SSHS | 5.15  | 1.67 | -1.63 | -3.67 | 5.00E-05 | 2.94E-03 |
| TCONS_00073793 | XLOC_045721 | chr4:14726596-14764487    | L26HS | SSHS | 5.50  | 1.67 | -1.72 | -3.97 | 5.00E-05 | 2.94E-03 |
| TCONS_00075546 | XLOC_046968 | chr4:163406842-163411822  | L26HS | SSHS | 2.23  | 1.06 | -1.08 | -3.07 | 5.00E-05 | 2.94E-03 |
| TCONS_00083566 | XLOC_052045 | chr5:156442031-156443235  | L26HS | SSHS | 7.31  | 2.07 | -1.82 | -5.38 | 5.00E-05 | 2.94E-03 |
| TCONS_00085669 | XLOC_053378 | chr5:83527920-83546861    | L26HS | SSHS | 2.81  | 0.99 | -1.50 | -3.74 | 5.00E-05 | 2.94E-03 |
| TCONS_00089742 | XLOC_055879 | chr6:108878529-108885432  | L26HS | SSHS | 2.45  | 1.16 | -1.08 | -2.60 | 5.00E-05 | 2.94E-03 |
| TCONS_00089813 | XLOC_055926 | chr6:111479305-111513963  | L26HS | SSHS | 4.49  | 1.05 | -2.10 | -4.29 | 5.00E-05 | 2.94E-03 |
| TCONS_00091268 | XLOC_056809 | chr6:23353151-23420140    | L26HS | SSHS | 0.60  | 0.09 | -2.70 | -4.18 | 5.00E-05 | 2.94E-03 |
| TCONS_00099537 | XLOC_061798 | chr7:132516468-132531171  | L26HS | SSHS | 2.60  | 1.19 | -1.12 | -2.84 | 5.00E-05 | 2.94E-03 |
| TCONS_00099994 | XLOC_062058 | chr8:13339574-13347392    | L26HS | SSHS | 1.07  | 0.28 | -1.95 | -3.14 | 5.00E-05 | 2.94E-03 |
| TCONS_00101316 | XLOC_062900 | chr8:65987991-65990258    | L26HS | SSHS | 1.59  | 0.51 | -1.63 | -3.80 | 5.00E-05 | 2.94E-03 |
| TCONS_00105479 | XLOC_065326 | chr8:112214827-112217010  | L26HS | SSHS | 2.61  | 0.87 | -1.58 | -4.06 | 5.00E-05 | 2.94E-03 |
| TCONS_00108810 | XLOC_067239 | chr9:19284677-            | L26HS | SSHS | 2.33  | 0.79 | -1.56 | -3.75 | 5.00E-05 | 2.94E-03 |



|                |             |                          |       |      |        |        |       |       |          |          |  |
|----------------|-------------|--------------------------|-------|------|--------|--------|-------|-------|----------|----------|--|
|                |             | 19311302                 |       |      |        |        |       |       |          |          |  |
| TCONS_00001918 | XLOC_001199 | chr1:83571846-83671140   | L26HS | SSHS | 1.63   | 0.45   | -1.87 | -2.87 | 1.00E-04 | 5.49E-03 |  |
| TCONS_00001919 | XLOC_001199 | chr1:83571846-83671140   | L26HS | SSHS | 2.45   | 0.54   | -2.18 | -2.77 | 1.00E-04 | 5.49E-03 |  |
| TCONS_00028980 | XLOC_017208 | chr13:75525885-75529130  | L26HS | SSHS | 0.27   | 0.63   | 1.24  | 2.88  | 1.00E-04 | 5.49E-03 |  |
| TCONS_00047859 | XLOC_029533 | chr18:13441583-13844199  | L26HS | SSHS | 0.89   | 0.28   | -1.66 | -2.76 | 1.00E-04 | 5.49E-03 |  |
| TCONS_00082829 | XLOC_051632 | chr5:137228271-13723323  | L26HS | SSHS | 4.84   | 3.25   | -0.58 | -2.04 | 1.00E-04 | 5.49E-03 |  |
| TCONS_00081221 | XLOC_050581 | chr5:33566015-33576310   | L26HS | SSHS | 1.62   | 0.53   | -1.61 | -3.14 | 1.50E-04 | 7.89E-03 |  |
| TCONS_00016204 | XLOC_009625 | chr10:71758980-71769416  | L26HS | SSHS | 12.21  | 6.16   | -0.99 | -2.24 | 2.00E-04 | 1.01E-02 |  |
| TCONS_00098082 | XLOC_060958 | chr7:75314754-75317954   | L26HS | SSHS | 1.17   | 0.32   | -1.86 | -2.86 | 2.00E-04 | 1.01E-02 |  |
| TCONS_00086644 | XLOC_054129 | chr5:136937546-136943795 | L26HS | SSHS | 0.26   | 0.13   | -0.98 | -2.18 | 2.50E-04 | 1.23E-02 |  |
| TCONS_00111103 | XLOC_068571 | chrX:45432799-45481633   | L26HS | SSHS | 0.26   | 0.11   | -1.28 | -2.34 | 2.50E-04 | 1.23E-02 |  |
| TCONS_00072874 | XLOC_045152 | chr3:166109913-166122083 | L26HS | SSHS | 1.27   | 0.41   | -1.63 | -2.43 | 3.00E-04 | 1.42E-02 |  |
| TCONS_00022970 | XLOC_013577 | chr11:86874388-86890364  | L26HS | SSHS | 0.61   | 0.23   | -1.39 | -2.35 | 4.00E-04 | 1.79E-02 |  |
| TCONS_00075034 | XLOC_046565 | chr4:146827358-146828994 | L26HS | SSHS | 19.66  | 11.47  | -0.78 | -2.20 | 4.00E-04 | 1.79E-02 |  |
| TCONS_00101263 | XLOC_062881 | chr8:63622122-63667892   | L26HS | SSHS | 2.11   | 0.81   | -1.39 | -2.93 | 4.00E-04 | 1.79E-02 |  |
| TCONS_00000383 | XLOC_000232 | chr1:24362624-24367361   | L26HS | SSHS | 0.61   | 0.15   | -1.97 | -2.40 | 4.50E-04 | 1.97E-02 |  |
| TCONS_00098322 | XLOC_061115 | chr7:90438540-90447890   | L26HS | SSHS | 3.28   | 1.20   | -1.46 | -3.68 | 4.50E-04 | 1.97E-02 |  |
| TCONS_00072876 | XLOC_045152 | chr3:166109913-166122083 | L26HS | SSHS | 1.06   | 0.26   | -2.01 | -2.44 | 5.50E-04 | 2.33E-02 |  |
| TCONS_00039702 | XLOC_023960 | chr16:3945547-4391453    | L26HS | SSHS | 1.75   | 0.41   | -2.09 | -2.47 | 8.00E-04 | 3.15E-02 |  |
| TCONS_00040459 | XLOC_024455 | chr16:32492681-32501908  | L26HS | SSHS | 1.03   | 0.36   | -1.52 | -2.20 | 8.00E-04 | 3.15E-02 |  |
| TCONS_00108812 | XLOC_067239 | chr9:19284677-19311302   | L26HS | SSHS | 0.90   | 0.28   | -1.72 | -2.24 | 8.00E-04 | 3.15E-02 |  |
| TCONS_00054456 | XLOC_033622 | chr2:72138009-72170595   | L26HS | SSHS | 260.33 | 154.10 | -0.76 | -2.09 | 8.50E-04 | 3.31E-02 |  |
| TCONS_00080466 | XLOC_050015 | chr4:241815509-241818400 | L26HS | SSHS | 0.37   | 0.11   | -1.70 | -2.52 | 8.50E-04 | 3.31E-02 |  |
| TCONS_00040325 | XLOC_024349 | chr16:26367335-26402760  | L26HS | SSHS | 1.65   | 0.79   | -1.05 | -1.98 | 9.00E-04 | 3.49E-02 |  |
| TCONS_00065158 | XLOC_040294 | chr3:13758694-13768920   | L26HS | SSHS | 0.33   | 0.19   | -0.81 | -1.99 | 9.00E-04 | 3.49E-02 |  |
| TCONS_00065545 | XLOC_040497 | chr3:35371915-35438852   | L26HS | SSHS | 0.53   | 0.17   | -1.62 | -2.06 | 9.00E-04 | 3.49E-02 |  |
| TCONS_00064652 | XLOC_040030 | chr20:39661989-39680148  | L26HS | SSHS | 0.55   | 0.15   | -1.86 | -2.19 | 9.50E-04 | 3.65E-02 |  |
| TCONS_00102066 | XLOC_063311 | chr8:109125740-109129890 | L26HS | SSHS | 0.35   | 0.18   | -1.00 | -1.99 | 1.00E-03 | 3.82E-02 |  |
| TCONS_00029009 | XLOC_017230 | chr13:76635112-76723739  | L26HS | SSHS | 2.60   | 0.04   | -5.94 | -5.26 | 1.15E-03 | 4.28E-02 |  |
| TCONS_00086628 | XLOC_054118 | chr5:136191663-136192650 | L26HS | SSHS | 0.78   | 0.30   | -1.39 | -2.59 | 1.30E-03 | 4.71E-02 |  |

**Supplementary Table S4. Sequence variants between the Brown Norway (BN) and SS rat genomes in the genes encoding lncRNAs TCONS\_00028980 and TCONS\_00029009.**

**Variants in TCONS\_00028980**

| Chr      | Pos      | Reference Nucleotide (BN) | SS/JrHsdMcwi (SS) |
|----------|----------|---------------------------|-------------------|
| 13       | 75525614 | C                         | T                 |
| 13       | 75526889 | A                         | G                 |
| 13       | 75527129 | T                         | C                 |
| 13       | 75528235 | A                         | G                 |
| 13       | 75528460 | C                         | T                 |
| 13       | 75528613 | T                         | C                 |
| Upstream |          |                           |                   |
| 13       | 75529241 | T                         | C                 |
| 13       | 75529255 | A                         | G                 |
| 13       | 75529541 | G                         | A                 |
| 13       | 75529736 | C                         | T                 |
| 13       | 75530286 | C                         | T                 |
| 13       | 75530593 | T                         | C                 |
| 13       | 75530684 | A                         | G                 |
| 13       | 75530688 | G                         | A                 |
| 13       | 75531067 | T                         | C                 |

**Variants in TCONS\_00029009**

| Chr | Pos      | Reference Nucleotide (BN) | SS/JrHsdMcwi (SS) |
|-----|----------|---------------------------|-------------------|
| 13  | 76636239 | C                         | T                 |
| 13  | 76637190 | A                         | C                 |
| 13  | 76637813 | A                         | G                 |
| 13  | 76637875 | G                         | A                 |
| 13  | 76638008 | A                         | G                 |
| 13  | 76638058 | A                         | C                 |
| 13  | 76638552 | T                         | A                 |
| 13  | 76638584 | T                         | G                 |
| 13  | 76638730 | T                         | C                 |
| 13  | 76638840 | G                         | A                 |
| 13  | 76638989 | A                         | G                 |
| 13  | 76639150 | A                         | G                 |
| 13  | 76639420 | G                         | T                 |
| 13  | 76640018 | T                         | C                 |
| 13  | 76641010 | C                         | A                 |
| 13  | 76641269 | A                         | G                 |

|    |          |   |   |
|----|----------|---|---|
| 13 | 76641274 | T | C |
| 13 | 76641301 | C | T |
| 13 | 76641694 | C | G |
| 13 | 76642101 | T | C |
| 13 | 76645230 | G | A |
| 13 | 76645374 | A | G |
| 13 | 76645552 | T | C |
| 13 | 76645894 | C | T |
| 13 | 76646079 | G | A |
| 13 | 76646909 | C | T |
| 13 | 76647739 | T | C |
| 13 | 76647812 | A | G |
| 13 | 76648255 | G | A |
| 13 | 76648939 | C | T |
| 13 | 76650412 | T | C |
| 13 | 76650430 | G | A |
| 13 | 76651707 | A | C |
| 13 | 76651859 | T | C |
| 13 | 76651878 | C | G |
| 13 | 76652329 | T | C |
| 13 | 76652923 | T | C |
| 13 | 76652978 | C | T |
| 13 | 76654621 | A | G |
| 13 | 76655512 | G | A |
| 13 | 76656227 | G | A |
| 13 | 76656271 | C | T |
| 13 | 76656393 | C | T |
| 13 | 76657413 | T | C |
| 13 | 76657754 | A | T |
| 13 | 76658151 | T | C |
| 13 | 76658879 | C | T |
| 13 | 76659028 | A | G |
| 13 | 76659072 | A | G |
| 13 | 76659201 | C | T |
| 13 | 76659418 | C | T |
| 13 | 76659435 | G | A |
| 13 | 76659911 | G | T |
| 13 | 76660077 | G | A |
| 13 | 76660752 | A | C |
| 13 | 76661094 | C | T |
| 13 | 76661172 | T | C |
| 13 | 76661685 | T | C |
| 13 | 76661790 | G | A |

|    |          |   |   |
|----|----------|---|---|
| 13 | 76662030 | C | T |
| 13 | 76662094 | C | T |
| 13 | 76662414 | A | T |
| 13 | 76664418 | G | C |
| 13 | 76664419 | A | T |
| 13 | 76664420 | G | C |
| 13 | 76664422 | G | C |
| 13 | 76666270 | G | C |
| 13 | 76666411 | C | T |
| 13 | 76666713 | C | T |
| 13 | 76668775 | C | T |
| 13 | 76670015 | A | C |
| 13 | 76671551 | G | A |
| 13 | 76673755 | G | A |
| 13 | 76673963 | A | G |
| 13 | 76674077 | A | T |
| 13 | 76674756 | T | C |
| 13 | 76674798 | G | A |
| 13 | 76675009 | G | A |
| 13 | 76675281 | G | A |
| 13 | 76675605 | A | C |
| 13 | 76676296 | A | G |
| 13 | 76676384 | A | C |
| 13 | 76676531 | G | A |
| 13 | 76679433 | A | G |
| 13 | 76679755 | C | G |
| 13 | 76679783 | T | C |
| 13 | 76679813 | T | C |
| 13 | 76679814 | A | G |
| 13 | 76679827 | T | G |
| 13 | 76680444 | G | C |
| 13 | 76680500 | T | C |
| 13 | 76680874 | T | C |
| 13 | 76681751 | A | G |
| 13 | 76682032 | A | G |
| 13 | 76682134 | C | T |
| 13 | 76682196 | A | C |
| 13 | 76682495 | C | T |
| 13 | 76682806 | A | T |
| 13 | 76683694 | G | A |
| 13 | 76683731 | T | C |
| 13 | 76683987 | T | C |
| 13 | 76684300 | T | C |

|    |          |   |   |
|----|----------|---|---|
| 13 | 76684396 | T | G |
| 13 | 76684712 | G | A |
| 13 | 76684789 | T | C |
| 13 | 76684866 | C | T |
| 13 | 76685069 | A | C |
| 13 | 76685315 | C | T |
| 13 | 76686073 | T | C |
| 13 | 76686654 | T | C |
| 13 | 76686964 | T | C |
| 13 | 76687327 | C | T |
| 13 | 76687415 | A | G |
| 13 | 76687949 | A | G |
| 13 | 76688940 | G | A |
| 13 | 76688999 | T | A |
| 13 | 76689569 | G | A |
| 13 | 76690167 | C | T |
| 13 | 76690714 | A | G |
| 13 | 76691007 | G | C |
| 13 | 76691447 | T | C |
| 13 | 76691985 | T | A |
| 13 | 76693015 | G | A |
| 13 | 76693312 | C | T |
| 13 | 76694326 | G | A |
| 13 | 76694340 | A | C |
| 13 | 76694587 | A | G |
| 13 | 76694779 | G | A |
| 13 | 76694997 | G | A |
| 13 | 76694998 | G | A |
| 13 | 76695021 | G | A |
| 13 | 76695165 | A | G |
| 13 | 76695199 | C | T |
| 13 | 76695248 | C | T |
| 13 | 76695349 | A | G |
| 13 | 76695373 | T | C |
| 13 | 76695556 | G | T |
| 13 | 76695561 | A | G |
| 13 | 76695563 | T | G |
| 13 | 76695882 | T | C |
| 13 | 76695918 | C | G |
| 13 | 76695946 | A | G |
| 13 | 76695986 | C | T |
| 13 | 76696041 | A | C |
| 13 | 76696064 | A | G |

|    |          |   |   |
|----|----------|---|---|
| 13 | 76696424 | C | A |
| 13 | 76697003 | A | G |
| 13 | 76697056 | A | G |
| 13 | 76697741 | C | T |
| 13 | 76697951 | C | G |
| 13 | 76698118 | C | T |
| 13 | 76698123 | A | G |
| 13 | 76698694 | T | C |
| 13 | 76698928 | A | G |
| 13 | 76699221 | G | A |
| 13 | 76699315 | A | G |
| 13 | 76700160 | A | G |
| 13 | 76700316 | T | C |
| 13 | 76700441 | T | G |
| 13 | 76700517 | T | A |
| 13 | 76701131 | G | C |
| 13 | 76701721 | A | G |
| 13 | 76701821 | T | C |
| 13 | 76708842 | G | A |
| 13 | 76708911 | C | G |
| 13 | 76708965 | C | T |
| 13 | 76708980 | C | G |
| 13 | 76708992 | T | C |
| 13 | 76709050 | G | A |
| 13 | 76709142 | C | T |
| 13 | 76709579 | C | T |
| 13 | 76709586 | T | C |
| 13 | 76709606 | C | G |
| 13 | 76709737 | C | T |
| 13 | 76709850 | T | C |
| 13 | 76709874 | T | G |
| 13 | 76710275 | T | C |
| 13 | 76710405 | C | G |
| 13 | 76710456 | T | A |
| 13 | 76710505 | A | G |
| 13 | 76710877 | T | C |
| 13 | 76710905 | G | A |
| 13 | 76711004 | C | T |
| 13 | 76711174 | A | G |
| 13 | 76711274 | T | C |
| 13 | 76711452 | C | T |
| 13 | 76712078 | G | A |
| 13 | 76712967 | G | C |

|    |          |   |   |
|----|----------|---|---|
| 13 | 76712972 | T | C |
| 13 | 76713517 | A | G |
| 13 | 76713522 | C | T |
| 13 | 76714192 | C | T |
| 13 | 76714349 | C | A |
| 13 | 76714531 | T | C |
| 13 | 76714631 | C | T |
| 13 | 76714677 | T | C |
| 13 | 76714680 | C | A |
| 13 | 76714741 | C | T |
| 13 | 76714745 | G | T |
| 13 | 76714766 | A | G |
| 13 | 76714800 | A | G |
| 13 | 76714813 | T | C |
| 13 | 76715092 | C | A |
| 13 | 76715273 | A | T |
| 13 | 76715372 | C | A |
| 13 | 76716191 | A | G |
| 13 | 76716659 | G | A |
| 13 | 76716680 | G | T |
| 13 | 76717579 | G | T |
| 13 | 76717589 | G | A |
| 13 | 76717599 | T | A |
| 13 | 76717886 | C | T |
| 13 | 76718061 | G | A |
| 13 | 76719192 | C | T |
| 13 | 76719907 | G | A |
| 13 | 76719933 | G | A |
| 13 | 76719945 | T | A |
| 13 | 76720354 | T | C |
| 13 | 76720878 | C | A |
| 13 | 76721192 | G | A |
| 13 | 76721220 | G | A |
| 13 | 76721417 | G | A |
| 13 | 76721515 | C | A |
| 13 | 76721846 | C | T |
| 13 | 76722070 | G | C |
| 13 | 76722357 | G | T |
| 13 | 76722656 | A | T |
| 13 | 76722873 | T | C |
| 13 | 76723058 | G | A |
| 13 | 76723207 | C | T |
| 13 | 76723348 | C | T |

|          |          |   |   |
|----------|----------|---|---|
| 13       | 76723368 | G | A |
| Upstream |          |   |   |
| 13       | 76723823 | A | G |
| 13       | 76723956 | T | G |
| 13       | 76724038 | C | T |
| 13       | 76724055 | C | T |
| 13       | 76724146 | C | T |
| 13       | 76724398 | T | C |
| 13       | 76725379 | A | C |
| 13       | 76725458 | T | A |
| 13       | 76725476 | A | G |
| 13       | 76725546 | T | C |
| 13       | 76725678 | C | T |

---



**Supplementary Figure S1. Analytical procedures and criteria for identifying lncRNAs in rats.** CBL, complete branch length; ORF, open reading frame; CDS, (protein) coding DNA sequence; FPKM, Fragments Per Kilobase of gene model per Million fragments mapped.

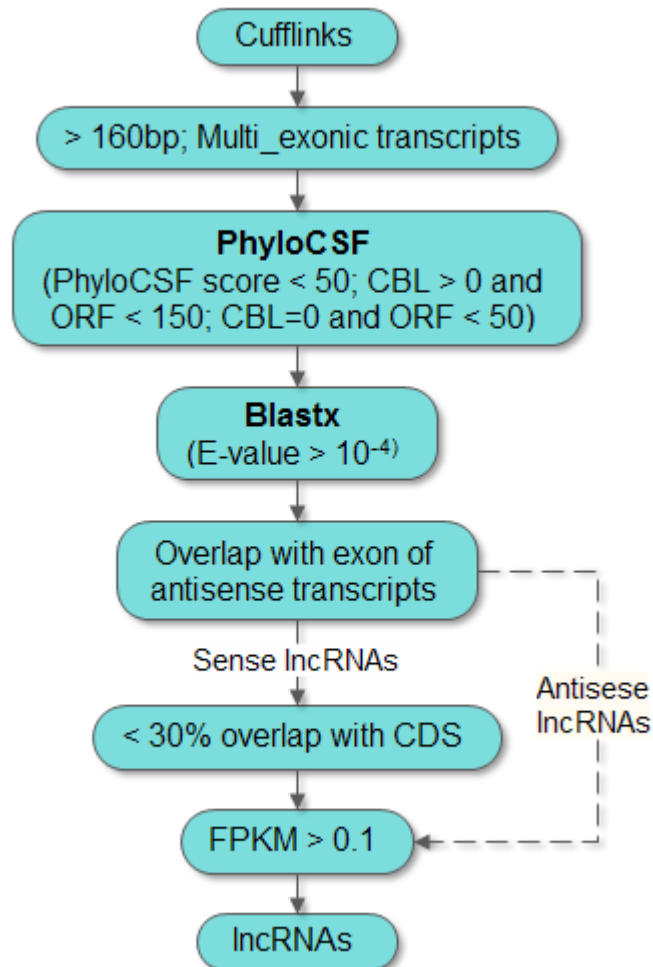

**Supplementary Figure S2. Number of lncRNAs expressed in one or more tissues.**

A. Overall summary. B, C, D, E showed number of lncRNAs expressed in 5, 4, 3, and 2 of the 6 tissues examined. Each bar represents a tissue. The bars with the same color indicate these tissues share common lncRNAs. See Supplementary Table S2 for abbreviations for tissue names.

A. Number of lncRNAs expressed in one or more tissues

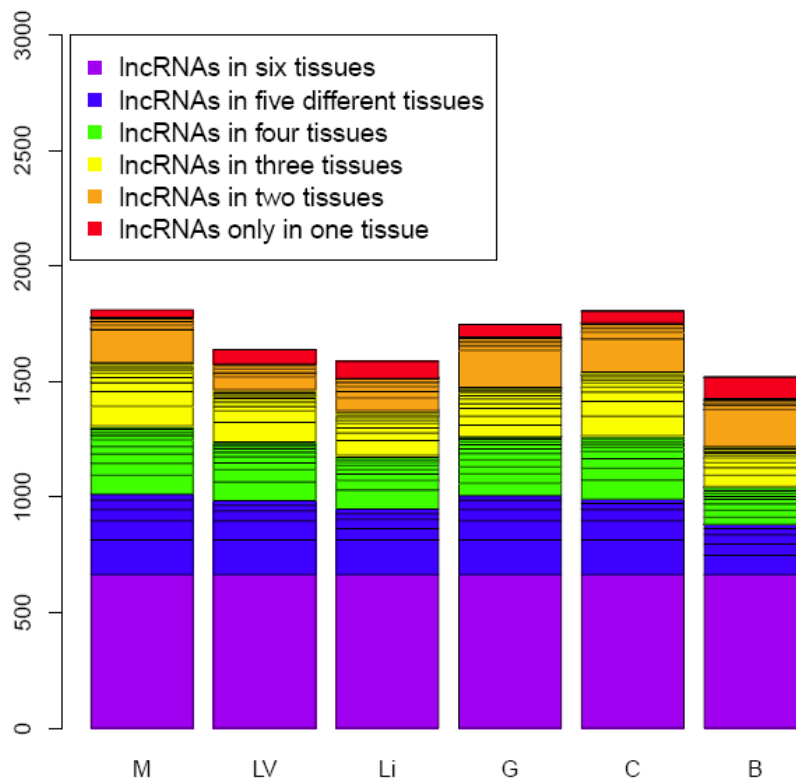

B. Number of lncRNAs expressed in 5 of the 6 tissues

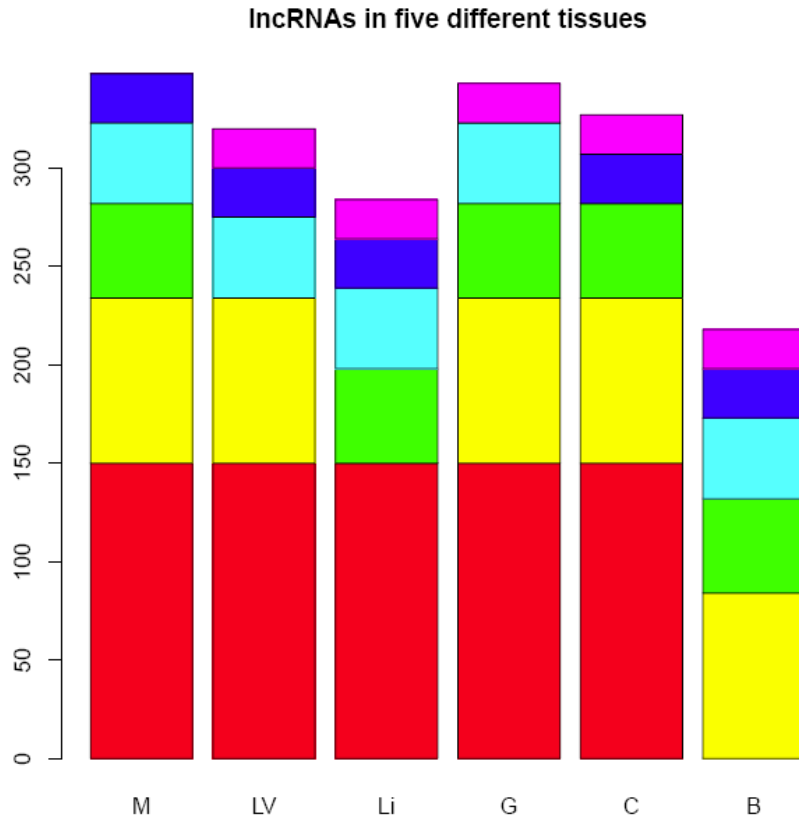

C. Number of lncRNAs expressed in 4 of the 6 tissues

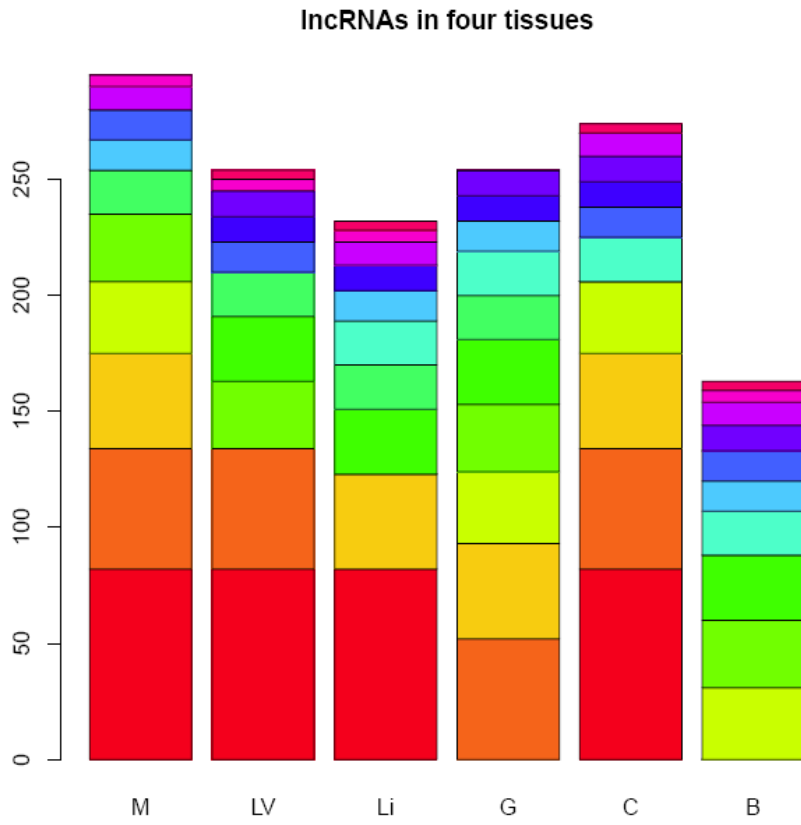

D. Number of lncRNAs expressed in 3 of the 6 tissues

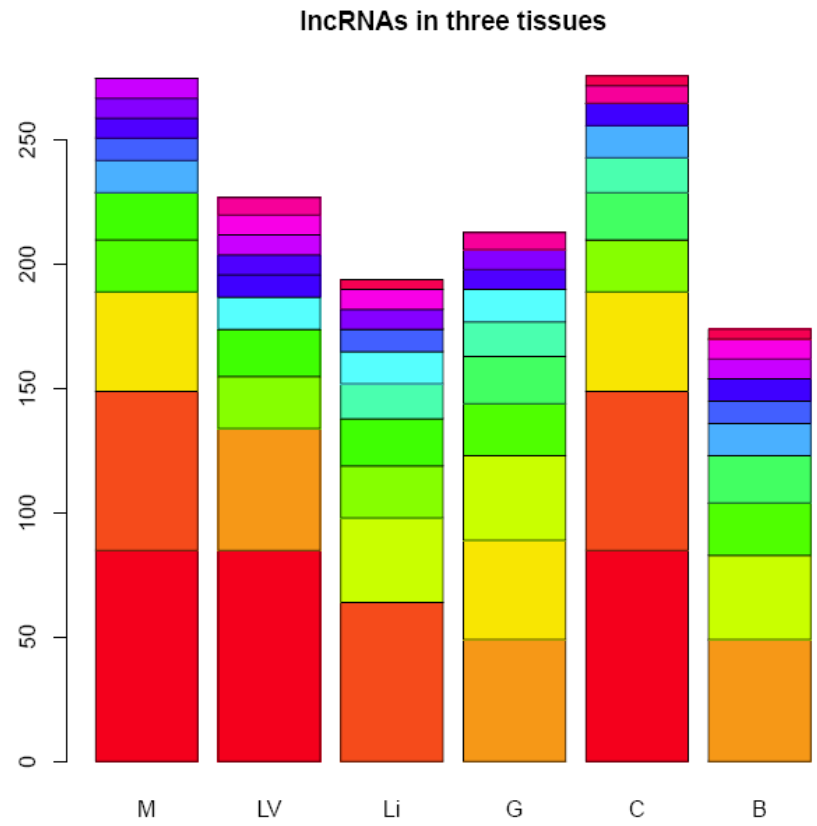

E. Number of lncRNAs expressed in 2 of the 6 tissues

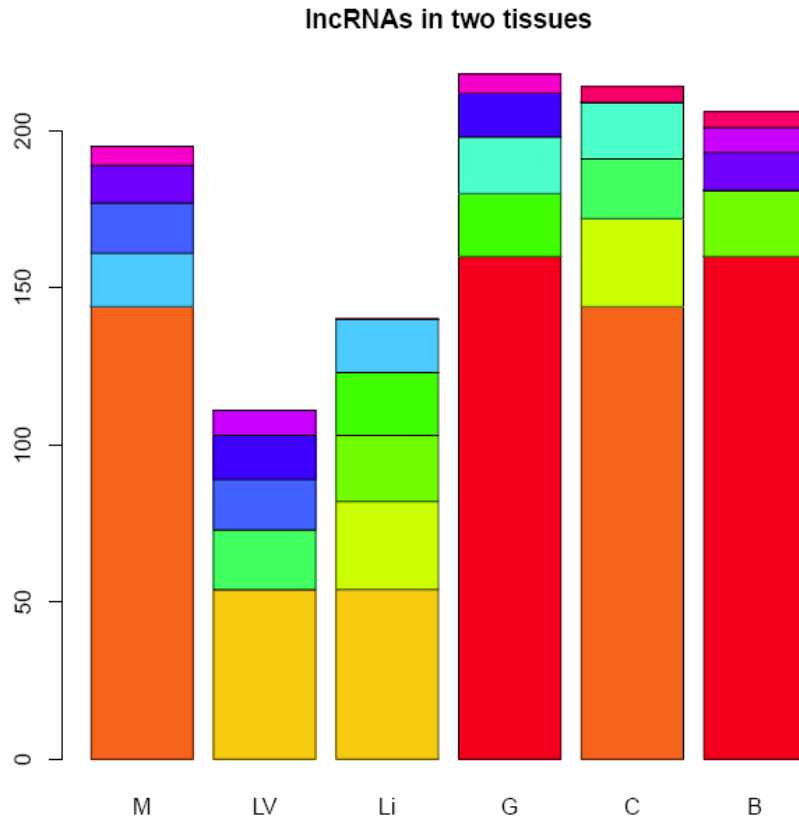

**Supplementary Figure S3. Abundance of rat lncRNAs compared to mRNA.** (A) For each lncRNA or mRNA, the maximum FPKM among the six tissues examined were chosen for plotting the histogram. (B) Median of FPKM among six tissues was presented. (C-H) Each tissue was presented separately. See Supplementary Table S2 for abbreviations for tissue names.

(A). Maximum expression among 6 tissues

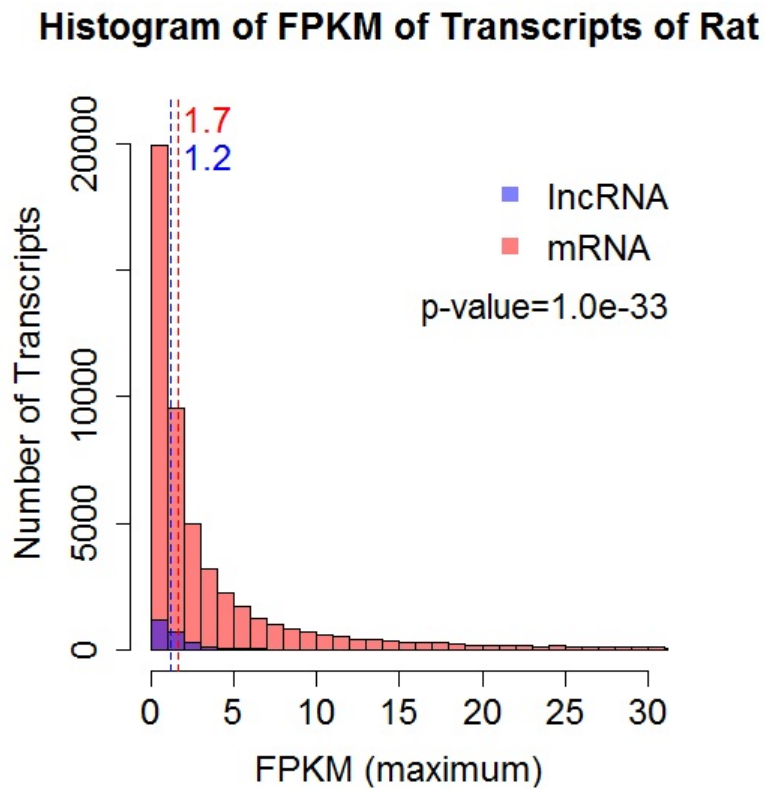

(B) Median of FPKM among tissues

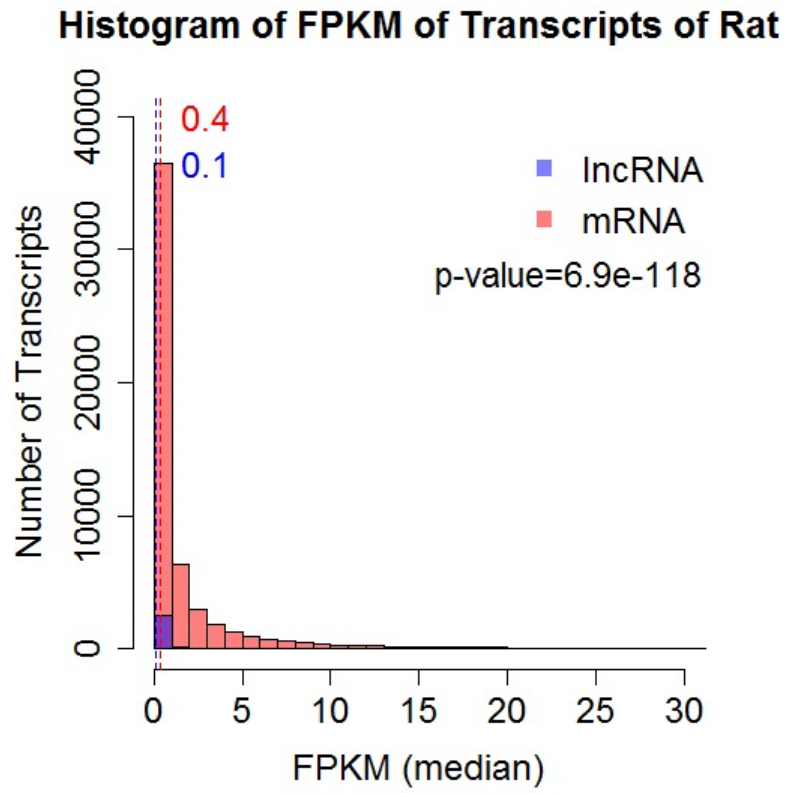



(C) Liver

**Histogram of FPKM of Liver**

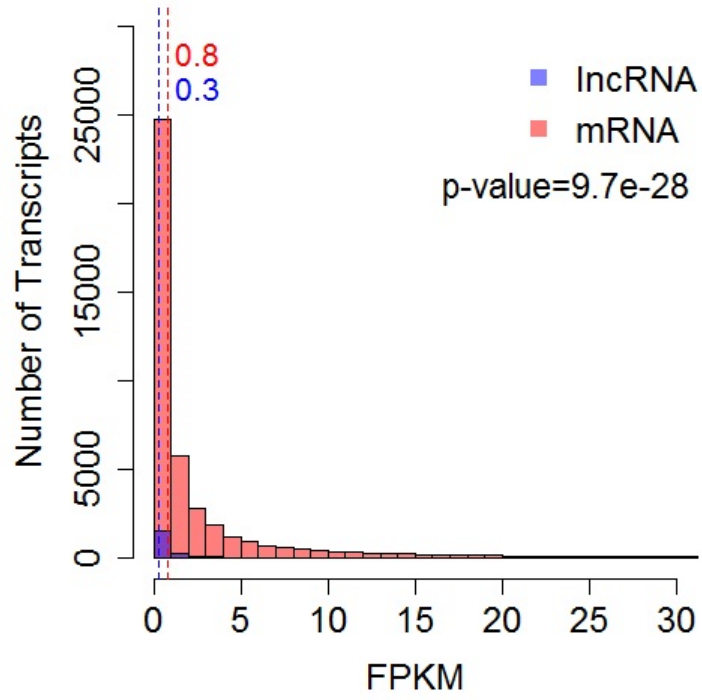

(D) Cardiac left ventricle

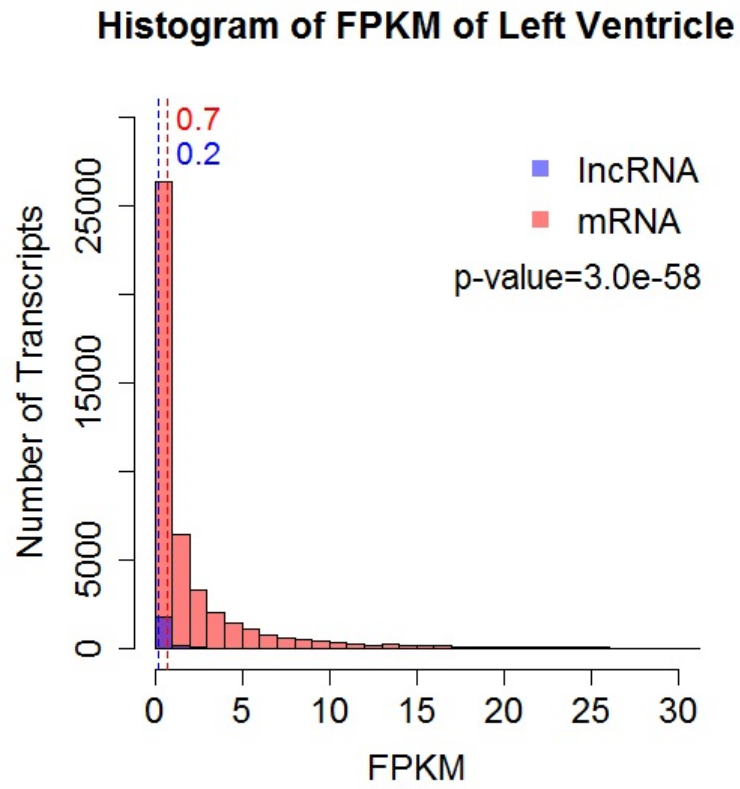

(E) Renal cortex

### Histogram of FPKM of Renal Cortex

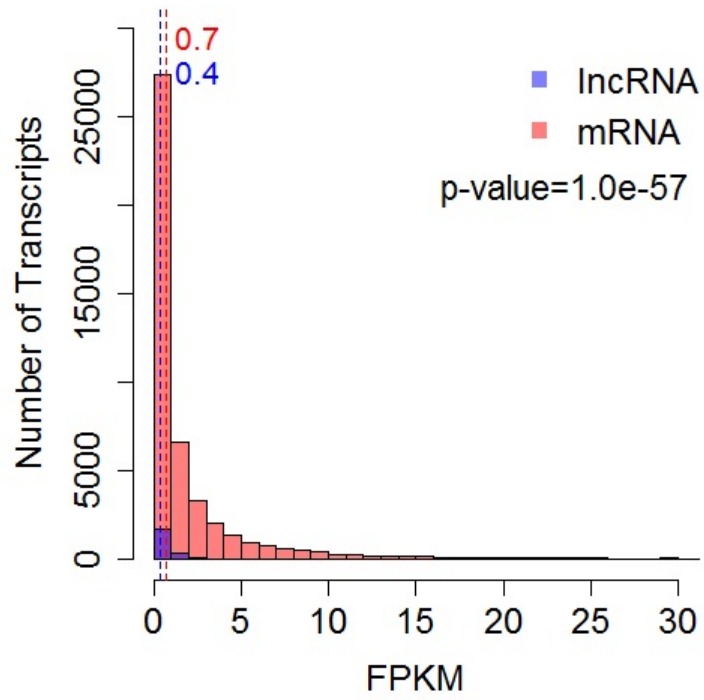

(F) Renal outer medulla

### Histogram of FPKM of Renal Outer Medulla

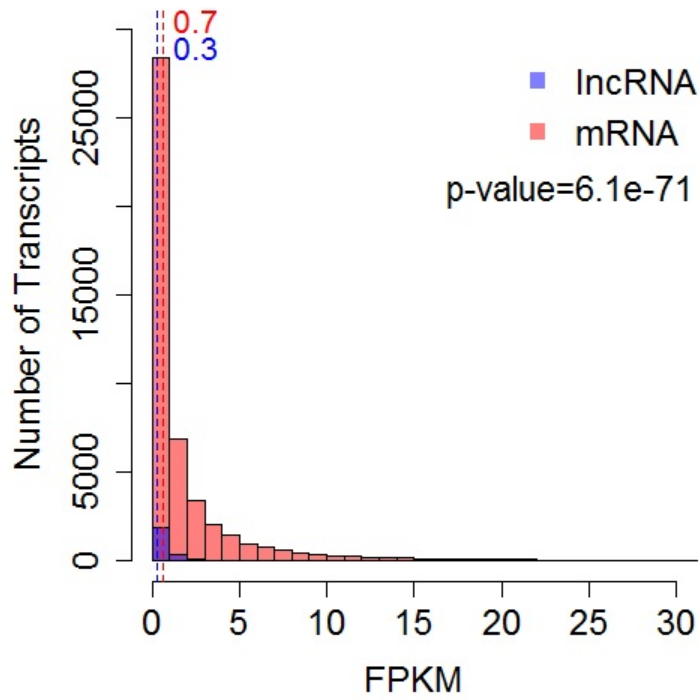

(G) Hypothalamus

**Histogram of FPKM of Hypothalamus**

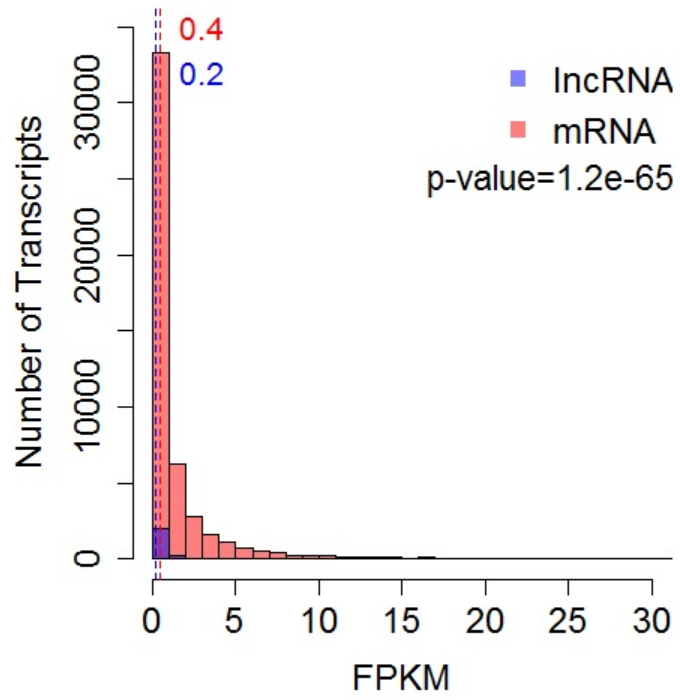

(H) Adrenal gland

**Histogram of FPKM of Adrenal Gland**

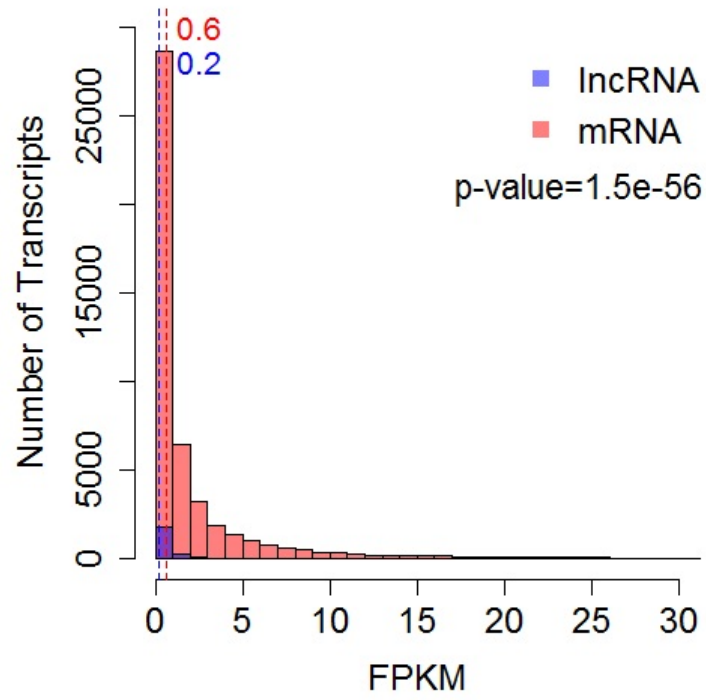

**Supplemental Figure S4. lncRNAs enriched in the renal outer medulla of BN rats had higher abundance in the renal outer medulla of SS and SS.13BN26 rats than lncRNAs enriched in the renal cortex of BN rats.** BN, Brown Norway rat; SS, Dahl salt-sensitive rat; L26, congenic SS.13<sup>BN26</sup> rat; M, renal outer medulla; C, renal cortex.

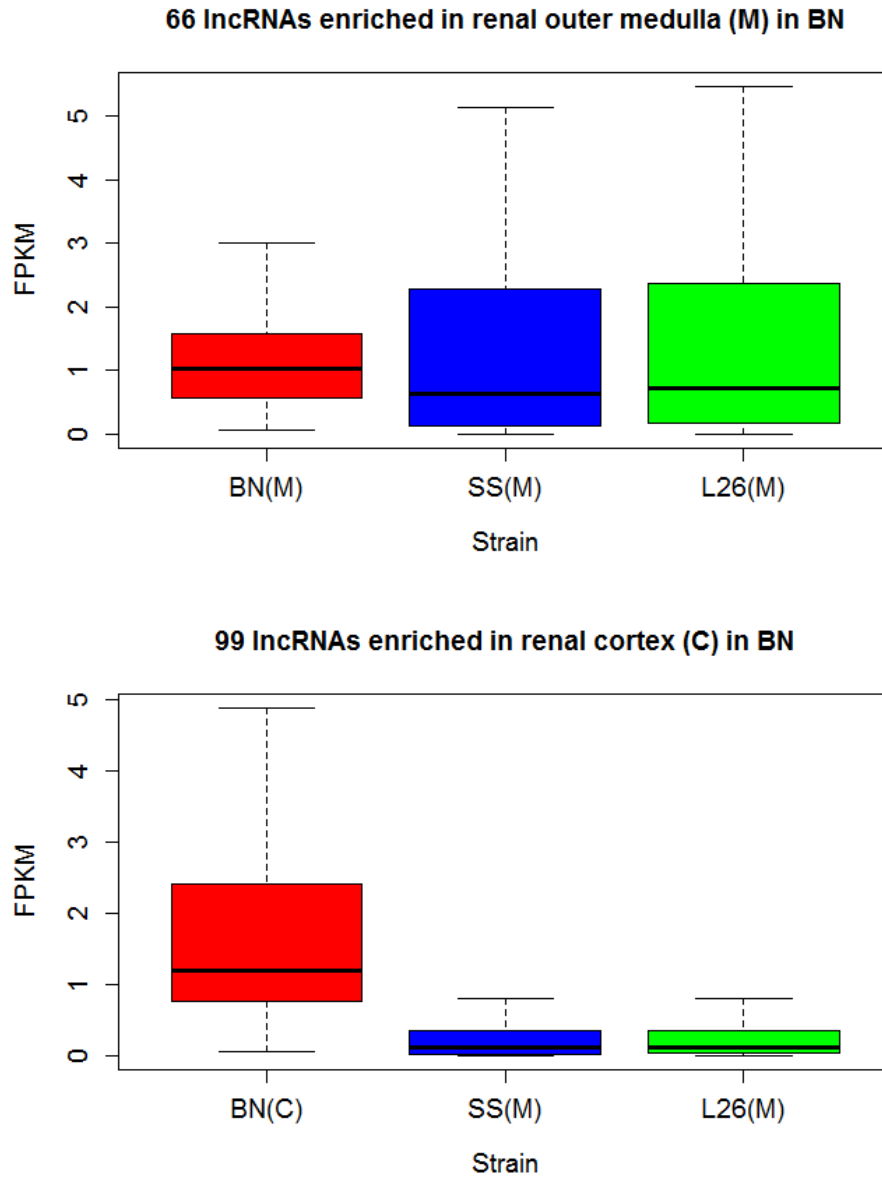

**Supplementary Figure S5. Number of lncRNAs differentially expressed between SS and SS.13<sup>BN26</sup> rats on 0.4% or 4% salt diet.**

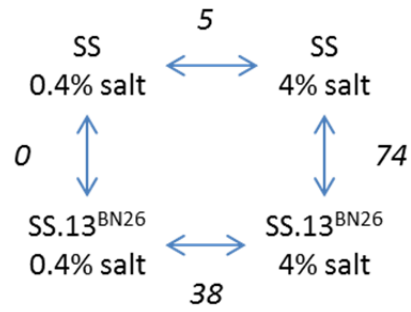



**Supplementary Dataset. Rat lncRNAs identified in six tissue regions or organs in Brown Norway rats.** Li, liver; LV, cardiac left ventricle; C, renal cortex; M, renal outer medulla; H, hypothalamus; A, adrenal gland. The dataset is in a separate Excel file.
